# Supplementary material for: A complete glacier inventory of the Antarctic Peninsula based on Landsat7 images from 2000–2002 and other pre-existing datasets
Source: Copernicus journal article supplement (doi:10.5194/essd-2016-47), 2016-09-15
Supplement: Supplementary file 1 [file essd-2016-47-supplement.pdf]

## Supplement

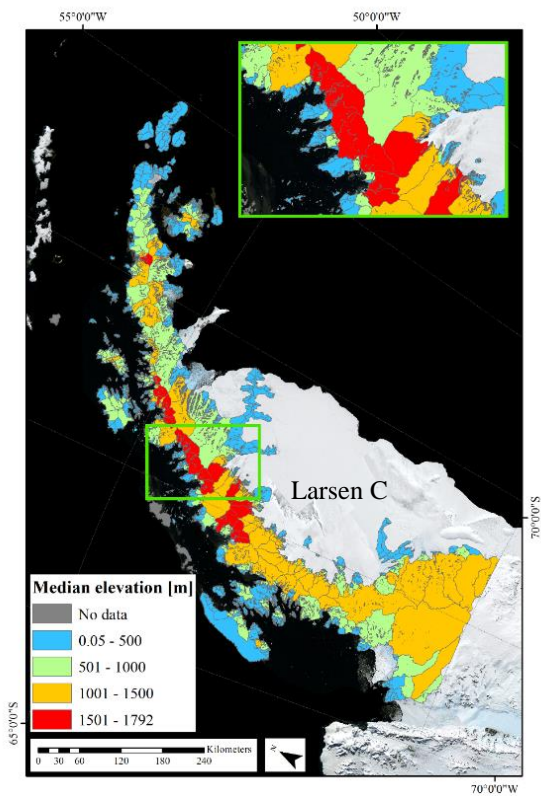

Supplement 1. Color-coded glacier areas for visualization of the median elevation for 1541 glaciers.

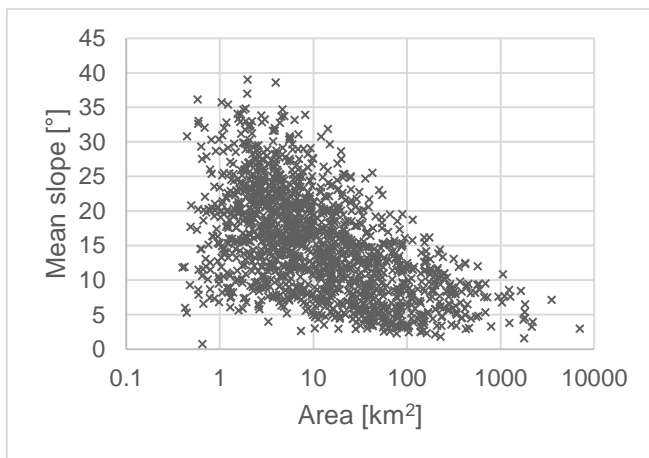

5 Supplement 2. Mean glacier slope vs. glacier area of 1541 glaciers.

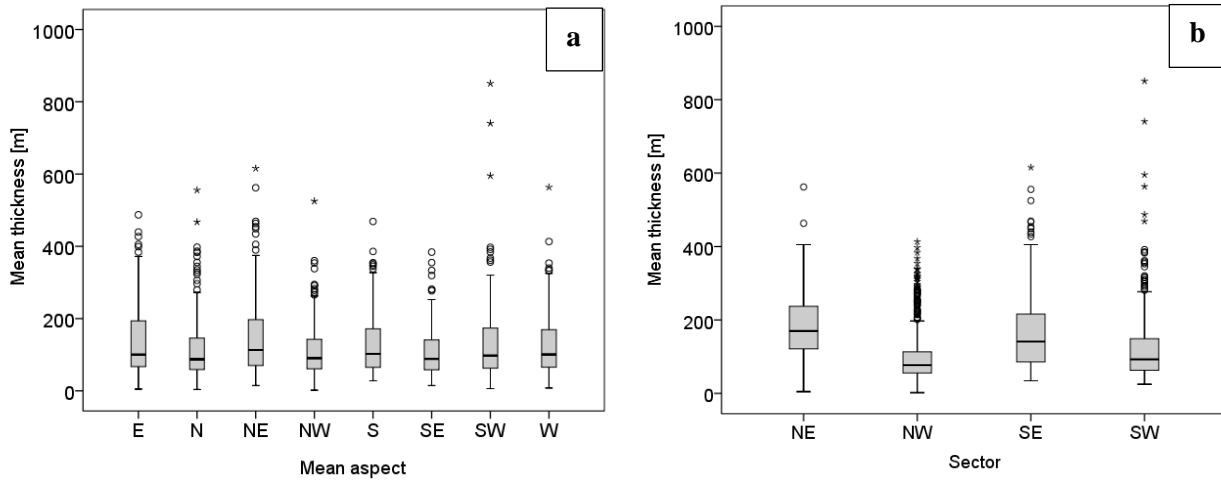

Supplement 3. Boxplots of a) mean thickness per mean aspect and b) mean thickness per sector of the 1539 glaciers including thickness information.

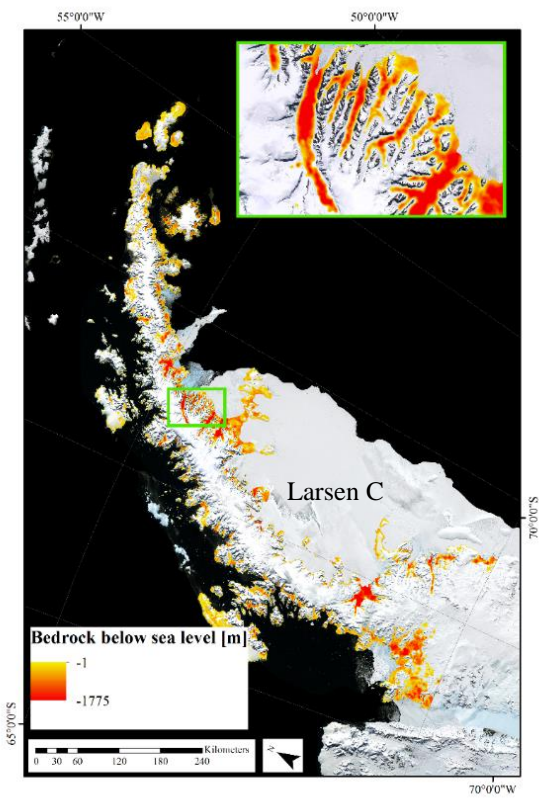

Supplement 4. Negative elevation values representing the bedrock below sea level.
